# Supplementary material
Source: PubMed Central journal article supplement (PMC3031403)
Supplement: blood-2010-06-292748_1.pdf [file blood-2010-06-292748_1.pdf]

# Figure S1

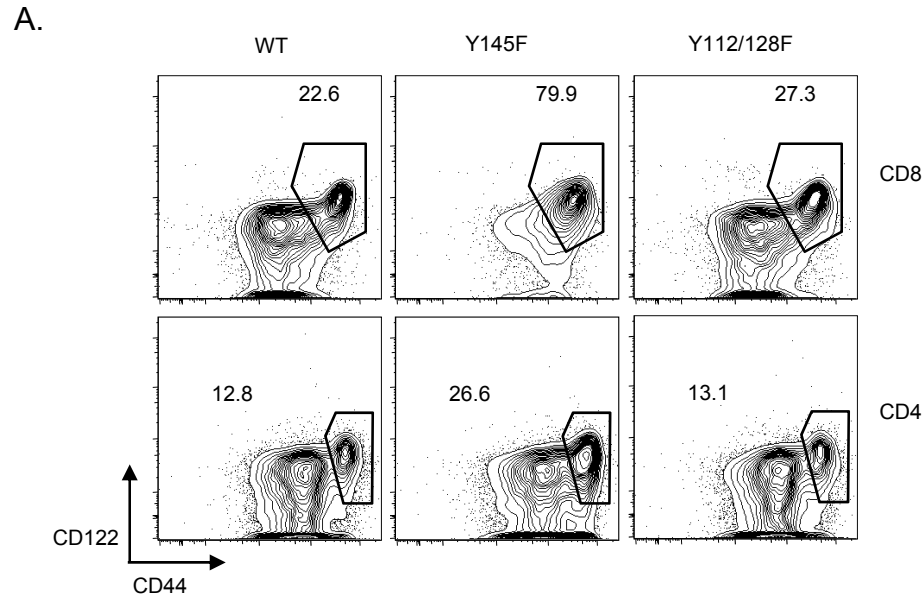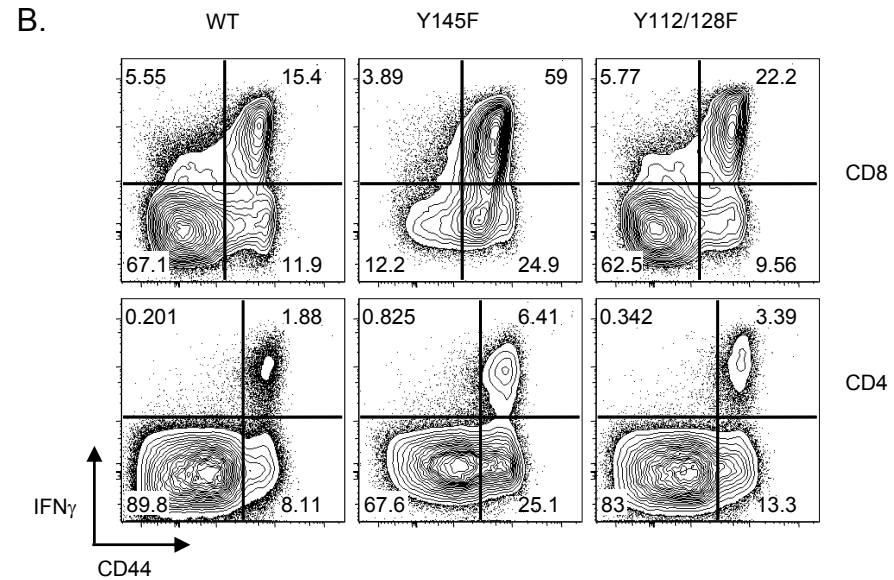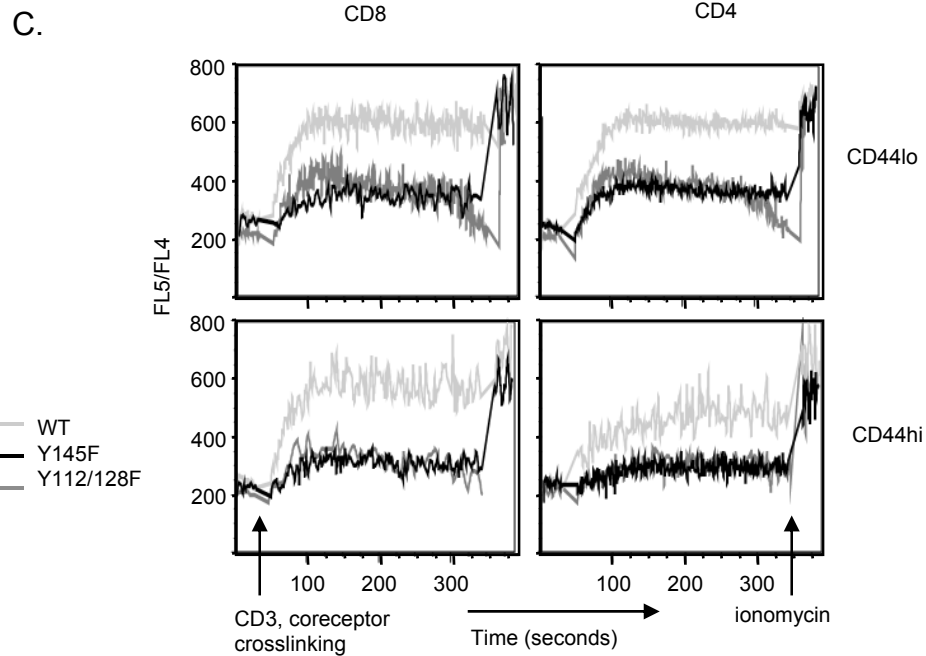

**Figure S1.** *Y145F KI mice show a preponderance of ILLs.* a) Contour plots show CD44 and CD122 surface expression on splenocytes from WT, Y145F and Y112/128F mice gated on either CD8<sup>+</sup> (top panel) or CD4<sup>+</sup> (bottom panel) lymphocytes (n=6). Numbers represent the percent of cells in each gate. b) Splenocytes from naive WT, Y145F and Y112/128F mice were incubated directly *ex vivo* with PMA and ionomycin for 5 hours. Contour plots show CD44 and IFN $\gamma$  expression in cells gated on CD8<sup>+</sup> or CD4<sup>+</sup> lymphocytes (n=3). Numbers indicate percent of cells within each gate. c) Ca<sup>2+</sup> flux was measured in WT, Y145F and Y112/128F CD4<sup>+</sup>CD44<sup>hi</sup>, CD4<sup>+</sup>CD44<sup>lo</sup>, CD8<sup>+</sup>CD44<sup>hi</sup> and CD8<sup>+</sup>CD44<sup>lo</sup> gated lymph node cells by flow cytometry following CD3, CD4 and CD8 cross-linking (n=3).

# Figure S2

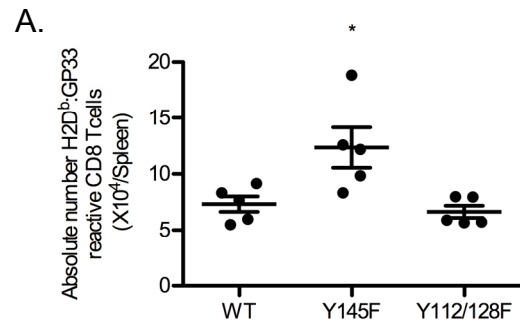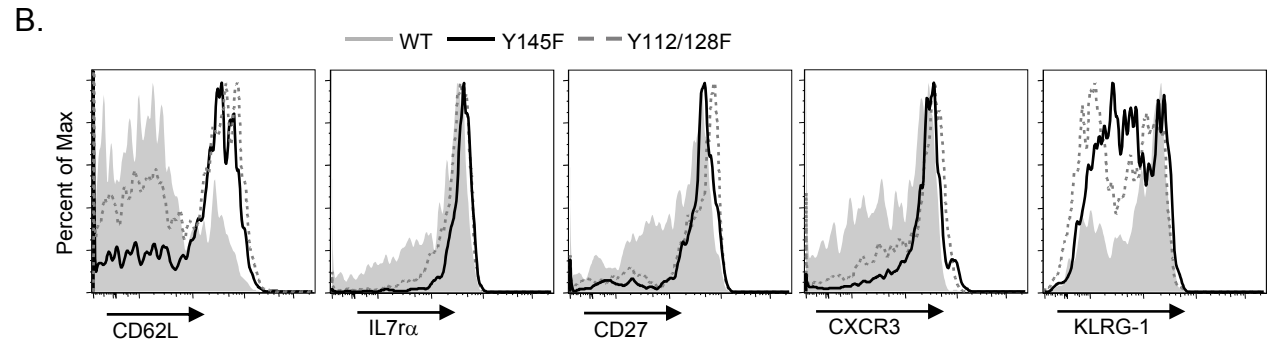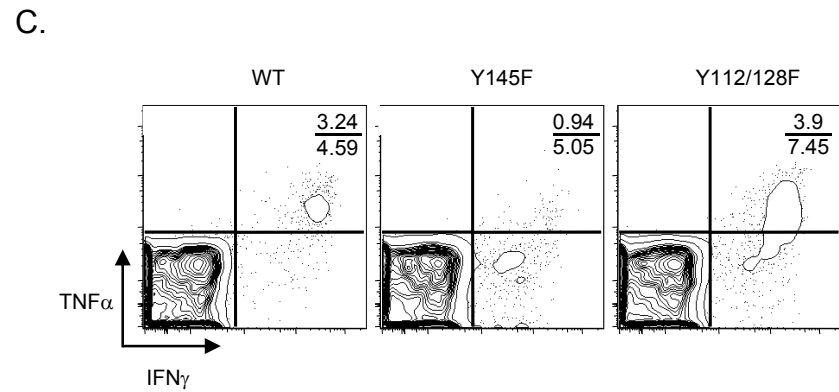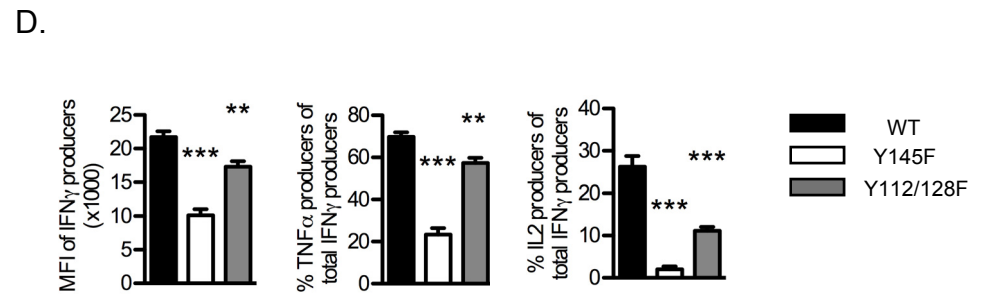

**Figure S2.** *SLP-76 KI LCMV-specific memory cells persist but show defective effector responses in vitro.* a) Absolute numbers of H2D<sup>b</sup>:GP33-reactive splenic CD8<sup>+</sup> T cells is shown  $\pm$  SEM. Each point represents an individual mouse. b) Representative histograms show CD62L, IL7r $\alpha$ , CD27, CXCR3 and KLRG-1 surface expression of H2D<sup>b</sup>:GP33<sup>+</sup>, CD8<sup>+</sup>, CD44<sup>+</sup> splenocytes from WT, Y145F and Y112/128F mice >day 70 p.i. (representative of 4 independent experiments each with 3-5 mice per group). c) Splenocytes from WT, Y145F and Y112/128F mice day >70 p.i. were incubated *ex vivo* with GP33 peptide. Representative contour plots show TNF $\alpha$  and IFN $\gamma$  expression on CD8<sup>+</sup> gated lymphocytes (left panel). Numbers indicate the percentage of CD8<sup>+</sup>, TNF $\alpha$  IFN $\gamma$  double producers over the percentage of total CD8<sup>+</sup> IFN $\gamma$  producers. d) The MFI of IFN $\gamma$  in all CD8<sup>+</sup> cells producing IFN $\gamma$  is shown (left graph). Percent of IFN $\gamma$  splenocytes that co-produced TNF $\alpha$  (center graph) or IL-2 (right graph) is shown. All graphs show average  $\pm$ SEM, significant p-values, when present, comparing KI to WT are indicated by asterisks: \*\*\*p<0.001, \*\*p=0.001-0.01, \*p=0.01-0.05.
